# Supplementary material
Source: PubMed Central journal article supplement (PMC7495461)

## Supporting Information

### Design and Development of Small-Molecule Arylaldoxime/5-Nitroimidazole Hybrids as Potent Inhibitors of MARK4: A Promising Approach for Target-Based Cancer Therapy

Mudasir Nabi Peerzada<sup>1</sup>, Parvez Khan<sup>2</sup>, Nashrah Sharif Khan<sup>2,3</sup>, Fernando Avecilla<sup>4</sup>, Shadab Miyan Siddiqui<sup>1</sup>, Md. Imtaiyaz Hassan<sup>2,\*</sup>, Amir Azam<sup>1,\*</sup>

<sup>1</sup>*Medicinal Chemistry Research Laboratory, Department of Chemistry, Jamia Millia Islamia, Jamia Nagar, New Delhi-110025, India.*

<sup>2</sup>*Centre for Interdisciplinary Research in Basic Sciences, Jamia Millia Islamia, Jamia Nagar, New Delhi-110025, India.*

<sup>3</sup>*Department of Biotechnology, Jamia Millia Islamia, Jamia Nagar, New Delhi-110025, India.*

<sup>4</sup>*Grupo Xenomar, Centro de Investigaci3n Cientificas Avanzadas (CICA), Departamento de Quimica, Facultade de Ciencias, Universidade da Coru3a, Campus A Coru3a, 15071, A Coru3a, Spain.*

#### Table of Contents

|                                                                                        |         |
|----------------------------------------------------------------------------------------|---------|
| 1. Experimental protocol for the synthesis of intermediates ( <b>2a-h</b> )            | S2-S3   |
| 2. Experimental protocol for the synthesis of carboximidoyl chlorides ( <b>3a-h</b> )  | S3-S4   |
| 3. Table S1: Molecular docking                                                         | S5      |
| 4. Interaction of compounds <b>4a-g</b> with various residues of MARK4                 | S6-S8   |
| 5. Table S2: Kinase selectivity profiling of compound <b>4h</b>                        | S8-S9   |
| 6. Table S3: Solubility data of compounds <b>4a-h</b>                                  | S9      |
| 7. Table S4: Bond lengths [Å] and angles [°] for the compounds <b>4c</b> and <b>4e</b> | S10     |
| 8. Table S5. Intermolecular hydrogen bonds for the compounds <b>4c</b> and <b>4e</b>   | S11     |
| 9. <sup>1</sup> H NMR and <sup>13</sup> C NMR of Compounds <b>4a-h</b>                 | S12-S19 |

## Experimental Protocols

### Synthesis of Arylaldoximes (2a-h)

Sodium hydroxide 3N (75.0 mmol) was added drop wise to a stirred suspension of hydroxylamine hydrochloride (75.0 mmol) in 30 mL of water at 0 °C. To this mixture different arylaldehydes (67.5mmol) taken in 40 mL ethanol were added dropwise and the reaction mixture was heated under reflux for 14-20 hours at 90 °C. The mixture was cooled, poured onto ice cold water to afford the arylaldoximes (**2a**, **2c**, **2e**, **2g** and **2h**) which were filtered and dried. However oximes (**2b**, **2d** and **2f**) were obtained by the process of extraction which was carried out with ethyl acetate and water. The organic layer was washed with brine, dried over anhydrous Na<sub>2</sub>SO<sub>4</sub>, filtered and then concentrated for the use in next step.

*N*-[(*E*)-Phenylmethylidene]hydroxylamine (**2a**). Yield: 90%; C<sub>7</sub>H<sub>7</sub>NO; ESI-MS (m/z): [M<sup>+</sup> + 1] 121.13

*N*-[(*E*)-(4-Methoxyphenyl)methylidene]hydroxylamine (**2b**). Yield: 85%; C<sub>8</sub>H<sub>9</sub>NO<sub>2</sub>; ESI-MS (m/z): [M<sup>+</sup> + 1] 151.16

*N*-[(*E*)-(4-Methylphenyl)methylidene]hydroxylamine (**2c**). Yield: 82%; C<sub>8</sub>H<sub>9</sub>NO; ESI-MS (m/z): [M<sup>+</sup> + 1] 135.16

*N*-[(*E*)-(4-Ethoxyphenyl)methylidene]hydroxylamine (**2d**). Yield: 89%; C<sub>9</sub>H<sub>11</sub>NO<sub>2</sub>; ESI-MS (m/z): [M<sup>+</sup> + 1] 165.18

*N*-[(*E*)-(4-Ethylphenyl)methylidene]hydroxylamine (**2e**). Yield: 80%; C<sub>9</sub>H<sub>11</sub>NO; ESI-MS (m/z): [M<sup>+</sup> + 1] 149.18

*N*-[(*E*)-(4-Chlorophenyl)methylidene]hydroxylamine (**2f**). Yield: 85%; C<sub>7</sub>H<sub>6</sub>ClNO; ESI-MS (m/z): [[M<sup>+</sup> + 1] 155.58

***N*-[(*E*)-(4-Nitrophenyl)methylidene]hydroxylamine (2g).** Yield: 84%; C<sub>7</sub>H<sub>6</sub>N<sub>2</sub>O<sub>3</sub>; ESI-MS (m/z): [M<sup>+</sup> + 1] 166.13

***N*-{(*E*)-[2-(Trifluoromethyl)phenyl]methylidene}hydroxylamine (2h).** Yield: 91%; C<sub>8</sub>H<sub>6</sub>F<sub>3</sub>NO; ESI-MS (m/z): [M<sup>+</sup> + 1] 189.13

### **Synthesis Procedure for Carboximidoyl chlorides (3a-h)**

*N*-Chlorosuccinimide (NCS) (43.91mmol) taken in DMF (60 ml) was added dropwise over a solution of different synthesized arylaldoximes (43.91mmol) in DMF and heated at 60 °C for 8-12 hours. The completion of the reaction was monitored by the TLC. The reaction mixture was cooled at room temperature, poured onto ice cold water, and then extracted with tetrabutylmethylether (TBME). The organic layer was filtered and evaporated to dryness (at 30 °C) to get the desired Carboximidoyl chlorides **3a-h**.

***N*-Hydroxybenzenecarboximidoyl chloride (3a).** Yield: 75 %; yellow solid; C<sub>7</sub>H<sub>6</sub>ClNO; ESI-MS (m/z): [M<sup>+</sup> + 1] 155.58

***N*-Hydroxy-4-methoxybenzene-1-carboximidoyl chloride (3b).** Yield: 75%; white solid; C<sub>8</sub>H<sub>8</sub>ClNO<sub>2</sub>; ESI-MS (m/z): [M<sup>+</sup> + 1] 185.60

***N*-Hydroxy-4-methylbenzene-1-carboximidoyl chloride (3c).** Yield: 90%; white solid; C<sub>8</sub>H<sub>8</sub>ClNO; ESI-MS (m/z): [M<sup>+</sup> + 1] 169.60

**4-Ethoxy-*N*-hydroxybenzene-1-carboximidoyl chloride (3d).** Yield: 90%; white solid; C<sub>9</sub>H<sub>10</sub>ClNO<sub>2</sub>; ESI-MS (m/z): [M<sup>+</sup> + 1] 199.63

**4-Ethyl-*N*-hydroxybenzene-1-carboximidoyl chloride (3e).** Yield: 73%; yellow solid; C<sub>9</sub>H<sub>10</sub>ClNO; ESI-MS (m/z): [M<sup>+</sup> + 1] 183.63

**4-Chloro-*N*-hydroxybenzene-1-carboximidoyl chloride (3f).** Yield: 87%; white solid;  
C<sub>7</sub>H<sub>5</sub>Cl<sub>2</sub>NO; ESI-MS (m/z): [M<sup>+</sup> + 1] 190.02

***N*-Hydroxy-4-nitrobenzene-1-carboximidoyl chloride (3g).** Yield: 86%; white solid;  
C<sub>7</sub>H<sub>5</sub>ClN<sub>2</sub>O<sub>3</sub>; ESI-MS (m/z): [M<sup>+</sup> + 1] 200.57

***N*-Hydroxy-2-(trifluoromethyl)benzene-1-carboximidoyl chloride (3h).** Yield: 93%; white  
solid; C<sub>8</sub>H<sub>5</sub>ClF<sub>3</sub>NO; ESI-MS (m/z): [M<sup>+</sup> + 1] 223.5

## Molecular docking

**Table S1.** Molecular docking results showing the binding energy and specific interacting residues of MARK4 with each synthesized target chemotypes **4a-h**

| Compound  | Docking score (Kcal/mol) | Protein-ligand interactions         |                          |                                                                                                                               |
|-----------|--------------------------|-------------------------------------|--------------------------|-------------------------------------------------------------------------------------------------------------------------------|
|           |                          | Hydrogen bonds                      |                          | Other interacting residues                                                                                                    |
|           |                          | Amino acid residues                 | Distance (Å)             |                                                                                                                               |
| <b>4a</b> | -6.8                     | Lys85<br>Asp196<br>Asp196<br>Asp196 | 3.2<br>2.1<br>3.2<br>3.3 | Ile62, Gly63, Lys64, Gly65, Val70, Ala83, Lys85, Val116, Asn183, Leu185, Ala195, Asp196,                                      |
| <b>4b</b> | -6.8                     | Lys85<br>Glu182                     | 2.4<br>3.2               | Ile62, Gly63, Lys64, Gly65, Ala68, Lys69, Val70, Ala83, Lys85, Tyr134, Ala135, Glu182, Asn183, Leu185, Ala195, Asp196         |
| <b>4c</b> | -7.1                     | Glu182<br>Asp196                    | 2.4<br>2.2               | Ile62, Gly63, Lys64, Gly65, Ala68, Lys69, Val70, Ala83, Lys85, Val116, Tyr134, Ala135, Glu182, Asn183, Leu185, Ala195, Asp196 |
| <b>4d</b> | -7.1                     | Glu182<br>Asn183                    | 2.2<br>1.8               | Ile62, Gly63, Lys64, Gly65, Ala68, Lys69, Val70, Ala83, Lys85, Val116, Met132, Glu133, Glu139, Glu182, Asn183, Ala195, Asp196 |
| <b>4e</b> | -7.3                     | Glu182<br>Lys64                     | 2.5<br>3.2               | Ile62, Gly63, Lys64, Gly65, Ala68, Lys69, Val70, Ala83, Lys85, Val116, Tyr134, Ala135, Glu182, Asn183, Leu185, Ala195, Asp196 |
| <b>4f</b> | -6.9                     | Lys85<br>Glu182<br>Asp196           | 3.2<br>2.5<br>2.8        | Ile62, Gly63, Lys64, Gly65, Ala68, Lys69, Val70, Ala83, Lys85, Val116, Tyr134, Ala135, Glu182, Asn183, Leu185, Ala195, Asp196 |
| <b>4g</b> | -7.6                     | Lys85<br>Asn183<br>Asp196<br>Asp196 | 3.1<br>3.3<br>1.8<br>3.2 | Gly63, Lys64, Ala68, Val70, Ala83, Ile84, Lys85, Val116, Leu130, Met132, Glu133, Glu182, Asn183, Ala195, Asp196               |
| <b>4h</b> | -7.5                     | Lys85<br>Asn183<br>Asp196           | 3.2<br>3.3<br>3.2        | Ile62, Gly63, Lys64, Ala68, Val70, Ala83, Lys85, Val116, Met132, Glu182, Asn183, Leu185, Ala195, Asp196                       |





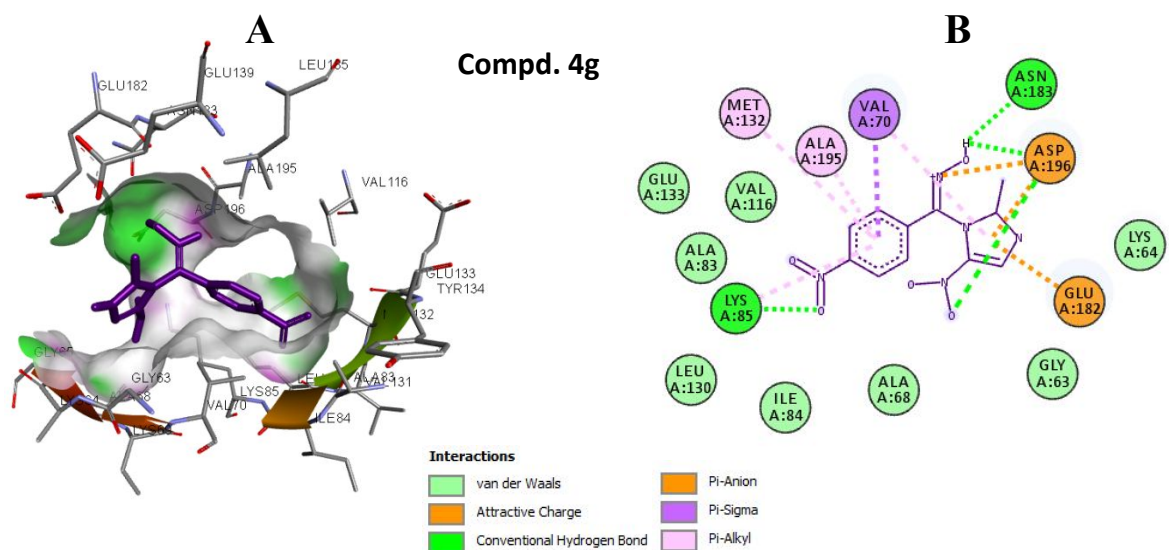

**Figure S3. Molecular docking studies of synthesized compounds with MARK4:** View of the catalytic pocket of MARK4 with (A) compound 4g, (B) 2D schematic representation of the docking models of compound 4g. Dotted lines in different colours reflected various types of interaction such as hydrogen bonding, charge or polar interactions, van der Waals and  $\pi$ -sigma interactions

### Serine/Threonine Kinase Panel Inhibition data

**Table S2.** Kinase selectivity profiling of compound 4h with 30 kinases of Ser/Thr family using kinase screening kit (Promega, Madison, USA) and malachite green assay.

| S.NO. | Kinase                   | % inhibition (at 10 $\mu$ M) of compound 4h |
|-------|--------------------------|---------------------------------------------|
| 1.    | Positive control (MARK4) | 98.67                                       |
| 2.    | Negative control         | 0.38                                        |
| 3.    | MAPKAPK2                 | 21.44                                       |
| 4.    | CHK1                     | 19.25                                       |
| 5.    | CHK2                     | 17.15                                       |
| 6.    | MARK1                    | 34.24                                       |
| 7.    | MELK                     | 13.93                                       |
| 8.    | PASK                     | 11.15                                       |
| 9.    | PIM1                     | 8.92                                        |
| 10.   | CAMK2 alpha              | 25.32                                       |
| 11.   | CAMK2beta                | 13.63                                       |
| 12.   | CAMK4                    | 27.62                                       |
| 13.   | CAMKI                    | 13.26                                       |
| 14.   | CAMKII                   | 9.55                                        |
| 15.   | CHKtide                  | 15.23                                       |



|     |           |       |
|-----|-----------|-------|
| 16. | ZIPtide2  | 21.46 |
| 17. | ZIPtide   | 11.28 |
| 18. | AMPKA1    | 7.33  |
| 19. | AMPKB1    | 7.80  |
| 20. | MBP       | 16.66 |
| 21. | SAMStide  | 6.97  |
| 22. | S6K       | 11.13 |
| 23. | PKCu      | 7.69  |
| 24. | CREBtide  | 6.27  |
| 25. | MBP2      | 10.22 |
| 26. | HSP27tide | 15.07 |
| 27. | STK33     | 11.45 |
| 28. | DAPK1     | 16.52 |
| 29. | ILK       | 6.24  |
| 30. | PDK3      | 20.29 |
| 31. | FASTK     | 7.77  |

### Solubility data

**Table S3.** Solubility of the compounds **4a-h** (mg/mL)

| <b>Compound No.</b> | <b>Aqueous Solubility (S)<br/>mg/mL</b> |
|---------------------|-----------------------------------------|
| <b>4a</b>           | 30±0.1                                  |
| <b>4b</b>           | 36±0.2                                  |
| <b>4c</b>           | 44±0.2                                  |
| <b>4d</b>           | 34±0.5                                  |
| <b>4e</b>           | 50±0.9                                  |
| <b>4f</b>           | 60±1.2                                  |
| <b>4g</b>           | 103±2.1                                 |
| <b>4h</b>           | 90±1.5                                  |

**Table S4.** Bond lengths [ $\text{\AA}$ ] and angles [ $^\circ$ ] for the compounds **4c** and **4e**

| <b>Bond lengths</b> | <b>4c</b>  | <b>4e</b> |
|---------------------|------------|-----------|
| O(1)-N(1)           | 1.3839(17) | 1.385(3)  |
| N(1)-C(1)           | 1.279(2)   | 1.278(3)  |
| C(1)-N(2)           | 1.4418(19) | 1.449(3)  |
| N(2)-C(9)           | 1.370(2)   | 1.368(3)  |
| N(2)-C(10)          | 1.3718(19) | 1.363(3)  |
| O(2)-N(4)           | 1.2294(17) | 1.229(3)  |
| O(3)-N(4)           | 1.2309(17) | 1.236(3)  |

  

| <b>Bond Angles</b> | <b>4c</b>  | <b>4e</b>  |
|--------------------|------------|------------|
| C(1)-N(1)-O(1)     | 113.06(13) | 113.96(19) |
| N(1)-C(1)-N(2)     | 121.53(14) | 121.4(2)   |
| C(9)-N(2)-C(10)    | 108.25(12) | 108.4(2)   |
| C(9)-N(2)-C(1)     | 126.35(13) | 127.6(2)   |
| C(10)-N(2)-C(1)    | 125.39(13) | 124.0(2)   |
| C(10)-N(3)-C(8)    | 104.47(12) | 104.6(2)   |

**Table S5.** Hydrogen bonds in the compounds **4c** and **4e**

| D-H...A             | compound  | d(D-H)  | d(H...A) | d(D...A)   | <(DHA)    |
|---------------------|-----------|---------|----------|------------|-----------|
| O(1)-H(1O)...N(3)#1 | <b>4c</b> | 0.94(2) | 1.82(3)  | 2.7589(17) | 175(2)    |
| O(1)-H(1O)...O(3)#1 | <b>4c</b> | 0.94(2) | 2.66(2)  | 3.1359(16) | 112.3(17) |
| O(1)-H(1O)...N(7)   | <b>4e</b> | 0.90(4) | 1.89(4)  | 2.743(3)   | 160(4)    |
| O(4)-H(4O)...N(3)#2 | <b>4e</b> | 1.02(4) | 1.74(4)  | 2.747(3)   | 169(4)    |
| O(4)-H(4O)...O(2)#2 | <b>4e</b> | 1.02(4) | 2.65(4)  | 3.252(3)   | 117(3)    |

Symmetry transformations used to generate equivalent atoms:

#1  $x+1/2, -y+1/2, z+1/2$  #2  $x, y, z+1$  #3  $x, y-1, z$  #4  $x, y+1, z$  #5  $-x-2, -y, -z+1$  #6  $-x, -y+1, -z$

# <sup>1</sup>H NMR of Compound 4a

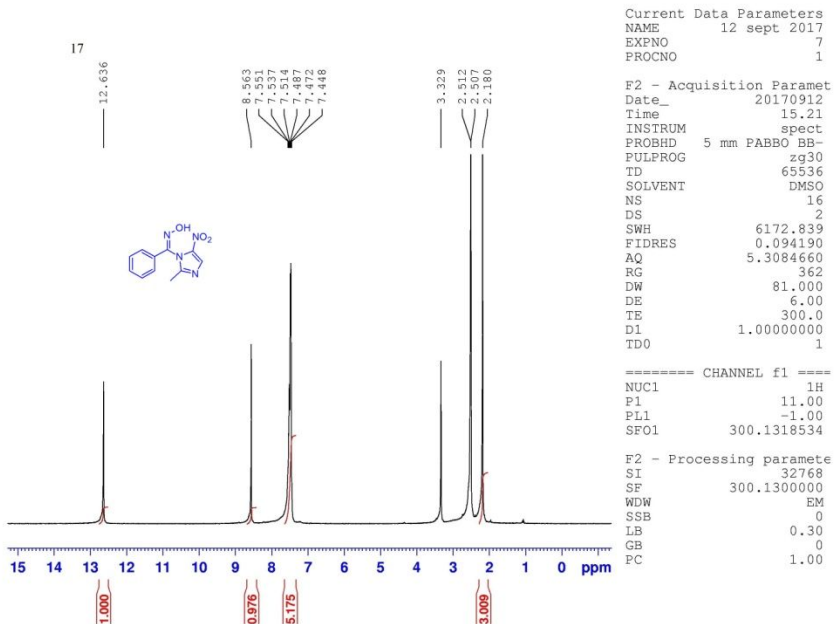

# <sup>13</sup>C NMR of Compound 4a

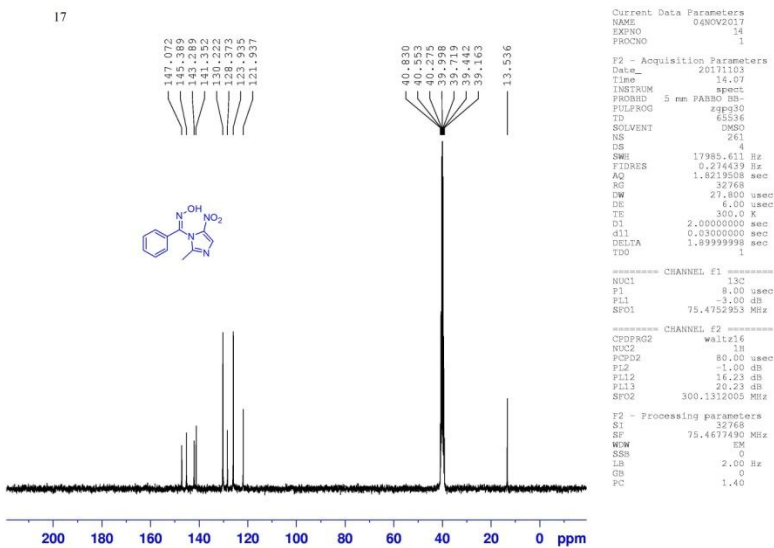

# <sup>1</sup>H NMR of Compound 4b

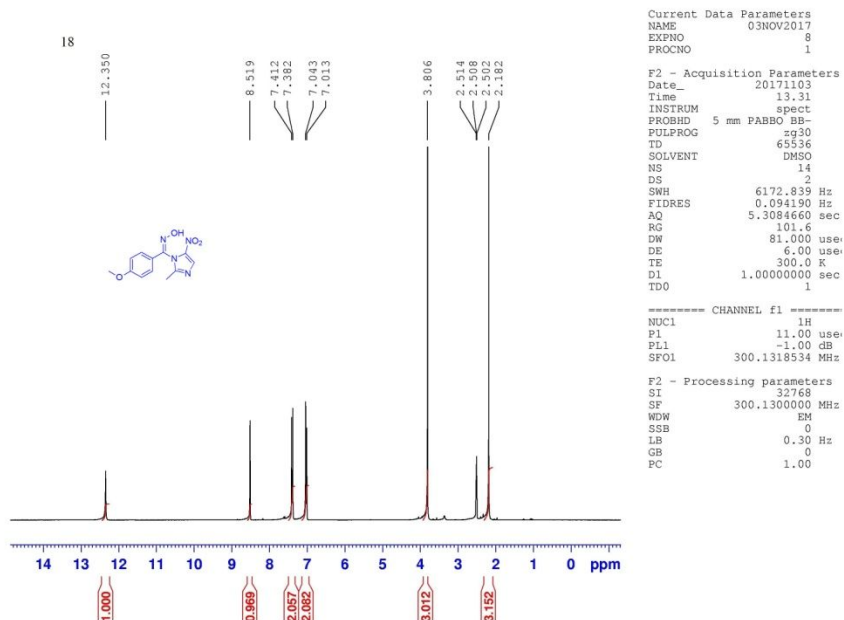

# <sup>13</sup>C NMR of Compound 4b

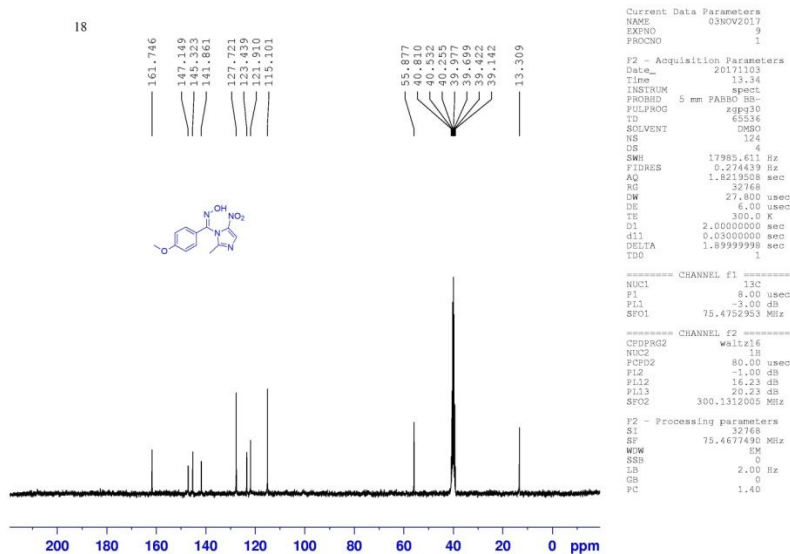

# <sup>1</sup>H NMR of Compound 4c

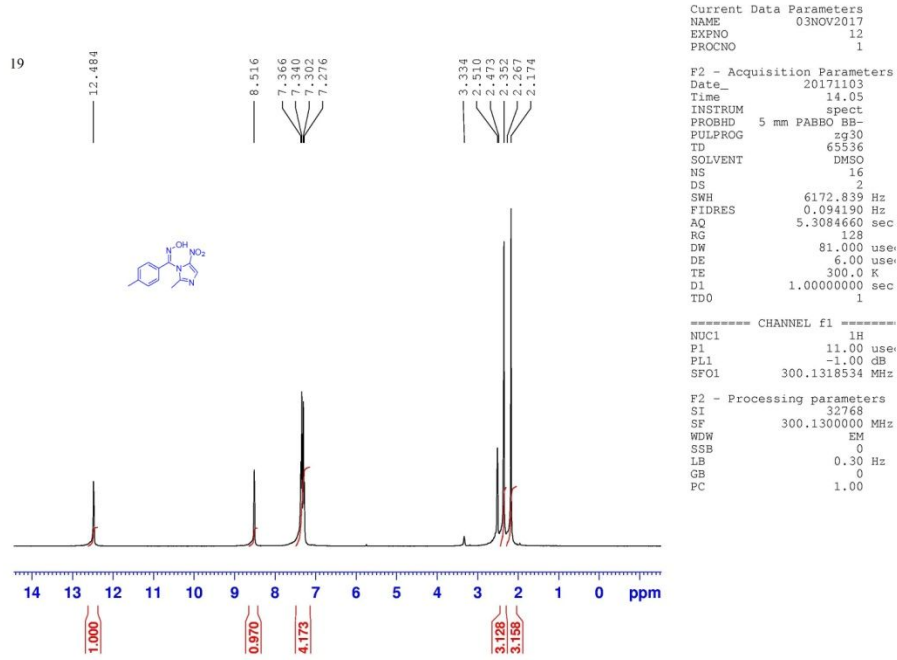

# <sup>13</sup>C NMR of Compound 4c

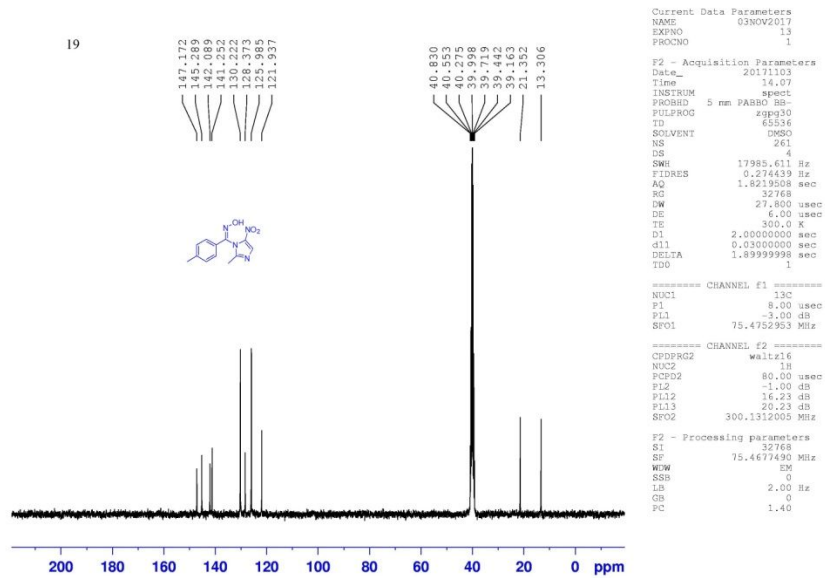

# <sup>1</sup>H NMR of Compound 4d

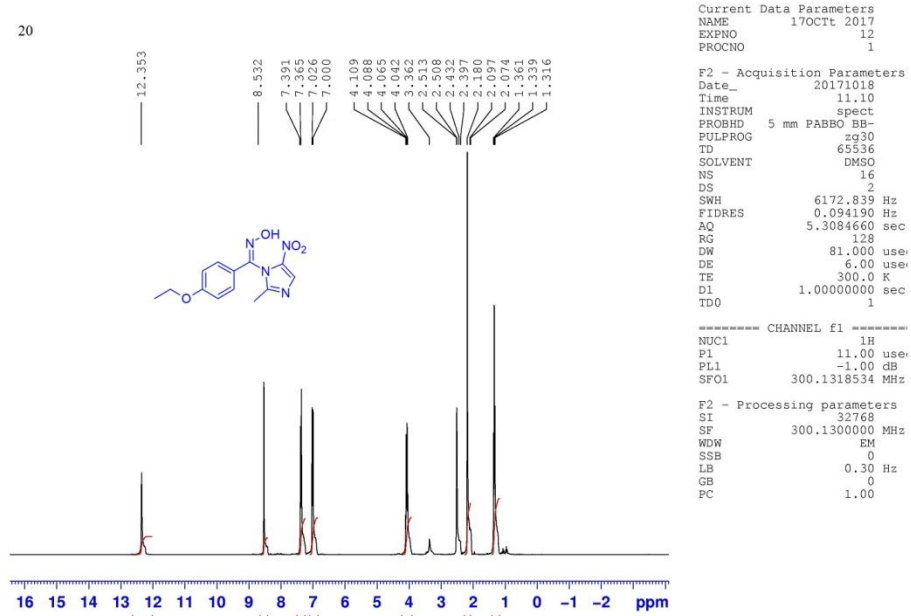

# <sup>13</sup>C NMR of Compound 4d

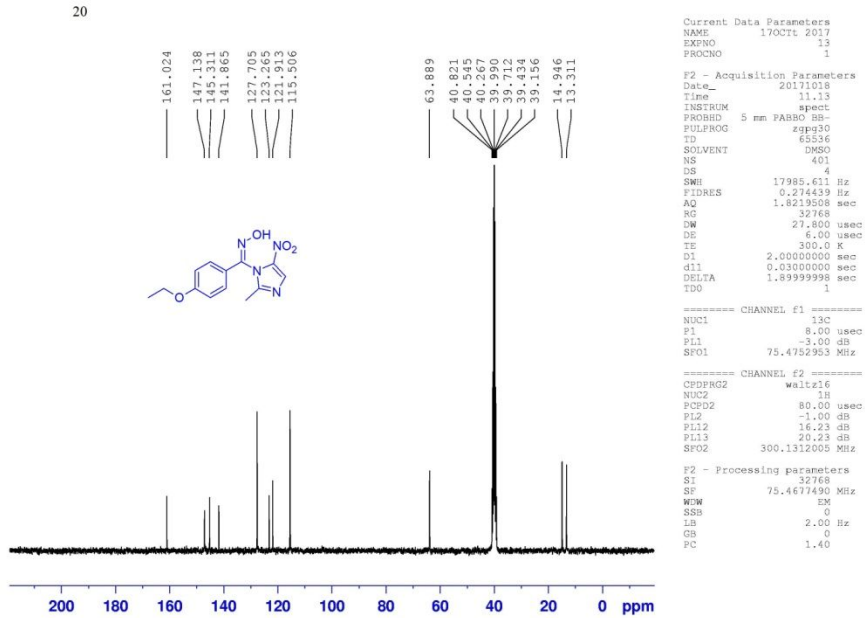

# <sup>1</sup>H NMR of Compound 4e

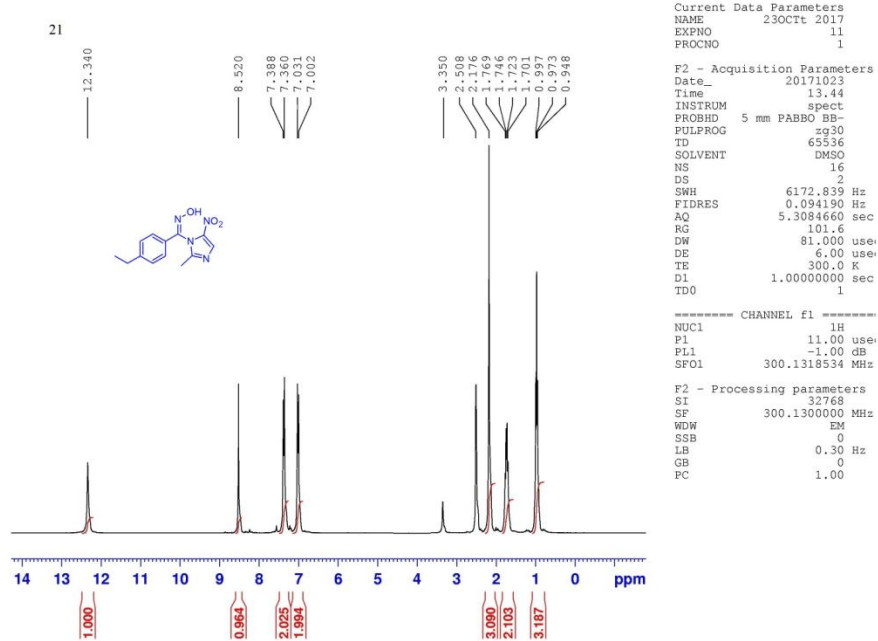

# <sup>13</sup>C NMR of compound 4e

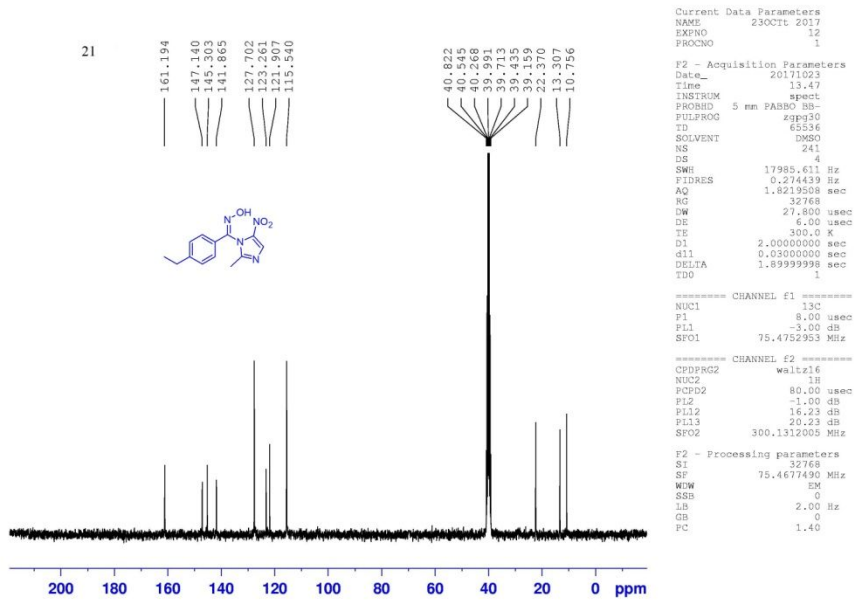



# <sup>1</sup>H NMR of Compound 4f

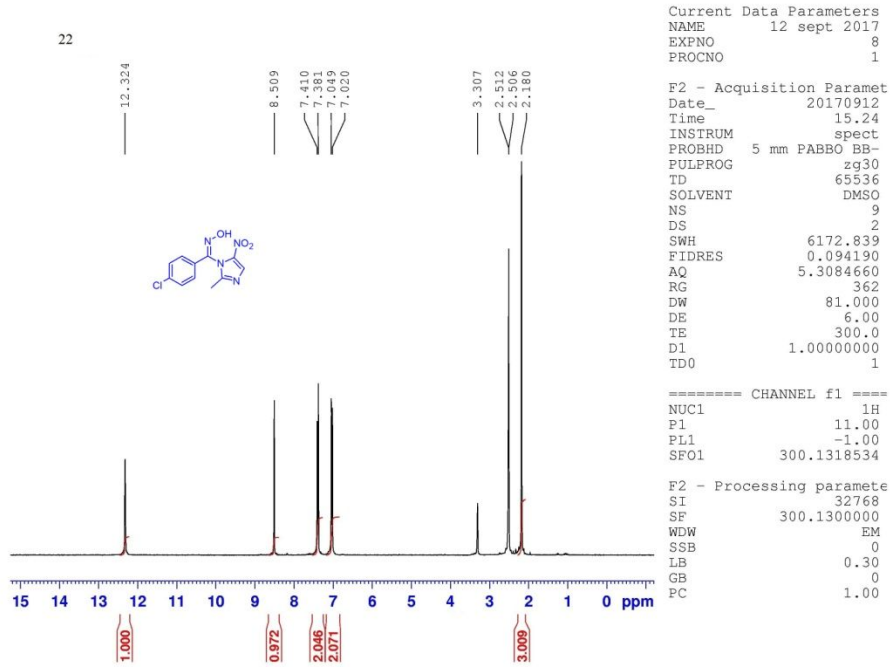

# <sup>13</sup>C NMR of Compound 4f

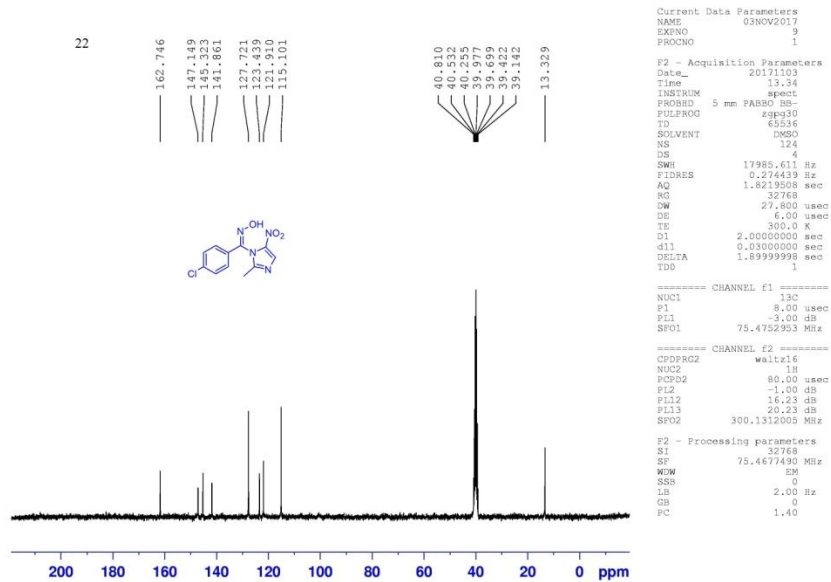



# <sup>1</sup>H NMR of Compound 4h

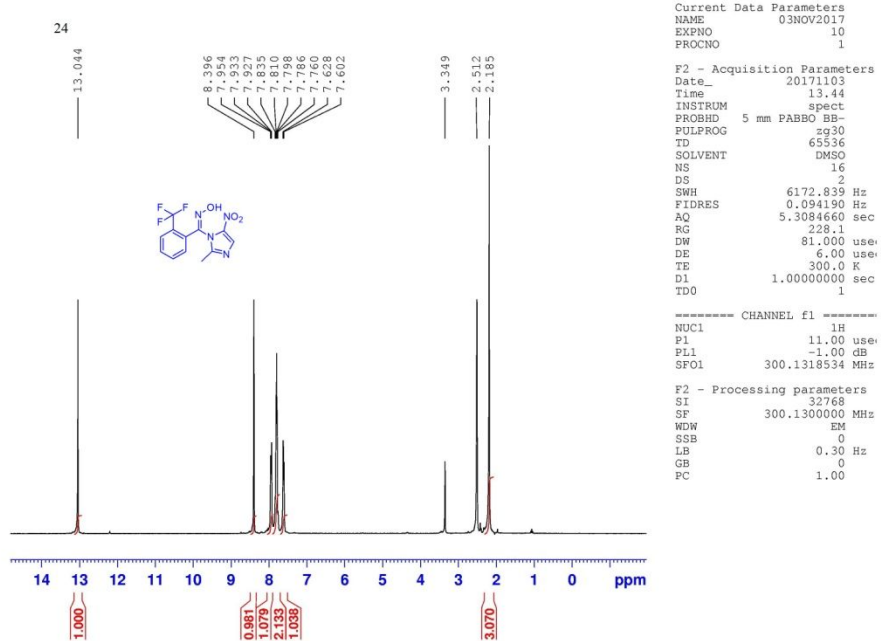

# <sup>13</sup>CNMR of Compound 4h

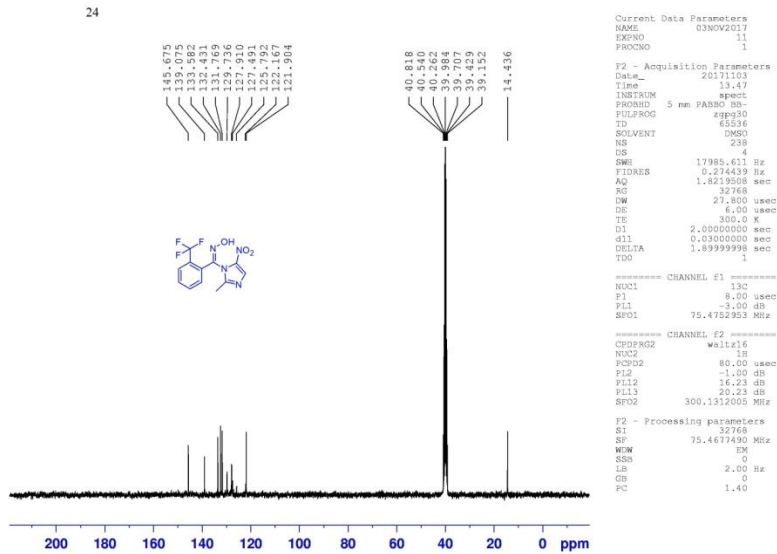

Supplement: ao0c01703_si_001.pdf [file ao0c01703_si_001.pdf]
